# Supplementary material
Source: PubMed Central journal article supplement (PMC10199081)
Supplement: 41541_2023_667_MOESM1_ESM.pdf [file 41541_2023_667_MOESM1_ESM.pdf]

## SUPPLEMENTARY INFORMATION

### Supplementary Tables

**Supplementary Table 1.** GBS CPS-PLL conjugate concentrations<sup>1</sup> used to prepare CM5 S-GBS-poly chips.

| GBS PLL     | Concentration used ( $\mu\text{g/mL}$ ) |
|-------------|-----------------------------------------|
| GBS Ia PLL  | 20                                      |
| GBS Ib PLL  | 15                                      |
| GBS II PLL  | 10                                      |
| GBS III PLL | 15                                      |
| GBS IV PLL  | 6                                       |
| GBS V PLL   | 6                                       |

<sup>1</sup>The optimal concentrations of the GBS poly-Lys (GBS PLL) conjugates used in amine crosslinking immobilization to CM5-S chip dextran surface. The optimal condition reflects the amount of the GBS PLL that gave maximal signal in pre-concentration scouting experiments, thus providing the maximal GBS PLL deposition on the dextran matrix for subsequent crosslinking.

### Supplementary Figures

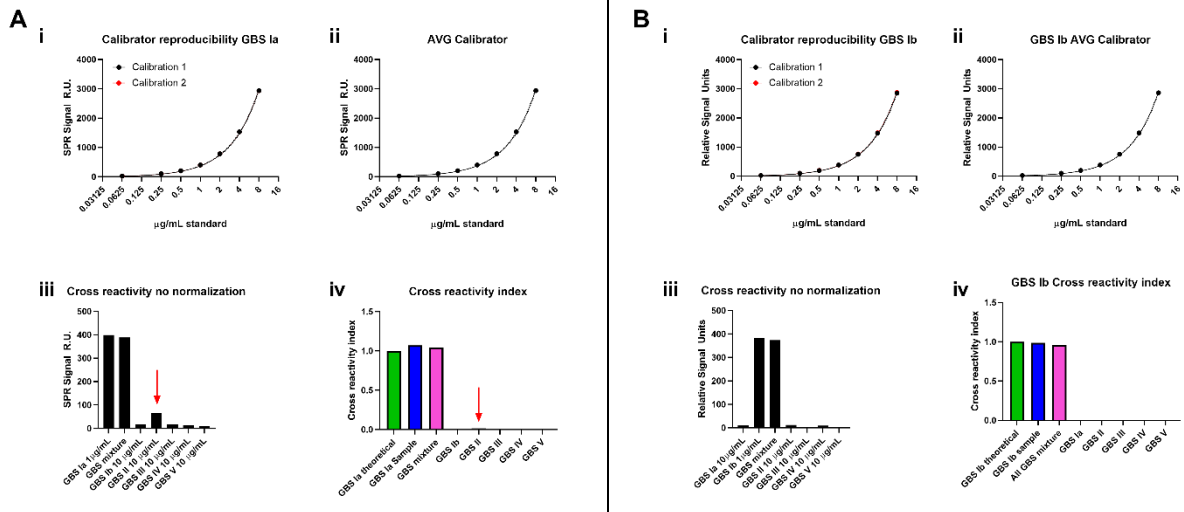

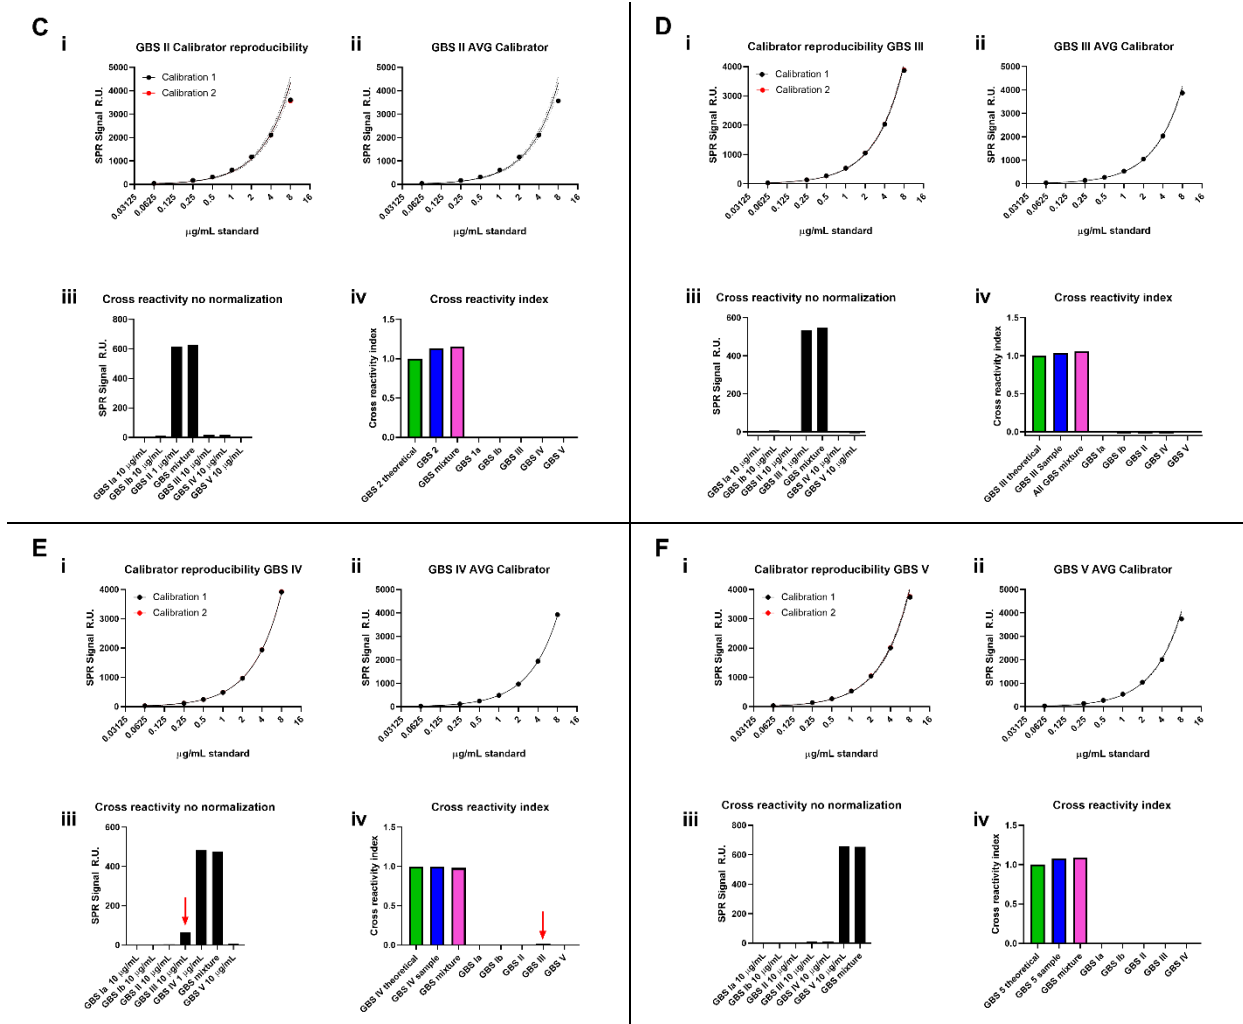

**Supplementary Figure 1. Monoclonal reference antibodies yield highly specific and reproducible calibration curves.** Calibrator antibodies for CPS serotypes Ia (A), Ib (B), II (C), III (D), IV (E) and V (F) were assessed by SPR with the homologous serotype shown individually (panel i) and as an average of the two replicates (panel ii). Cross-reactivity was also assessed with individual mAbs and a mixture of all 6 mAbs with the homologous and heterologous CPS serotype (iii). GBS mixture samples contained 10 µg/mL of each 5 non-target mAbs and 1 µg/mL of the target mAb. The cross-reactivity index (panel iv) represented the concentration-normalized SPR signals from panel iii. An index value of 1 indicated that specific and nonspecific antibodies were indistinguishable, whereas an index value of 0 indicated nonspecific interaction was completely absent.

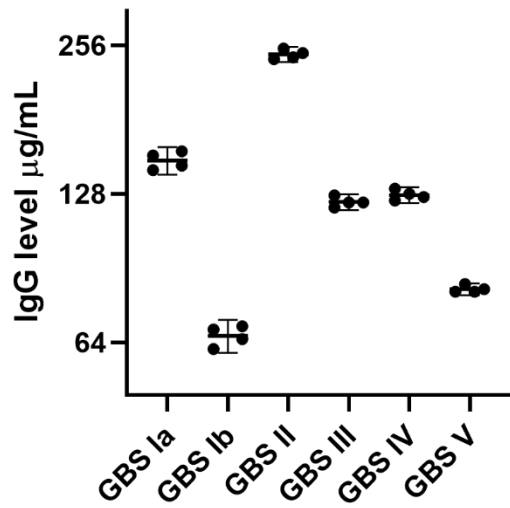

**Supplementary Figure 2. The SPR-based assay provides for reproducible and accurate measurements of serotype-specific IgG levels in human serum.** Data from four independent replicates are shown for each serotype, with the average and 95% confidence interval (CI) shown.
